# Supplementary material for: A Study of the Demographics of Web-Based Health-Related Social Media Users
Source: PubMed Central journal article supplement (PMC4705027; doi:10.2196/jmir.4308), 2015-08-06
Supplement: jmir_v17i8e194_app1.pdf [file jmir_v17i8e194_app1.pdf]

## Appendix

### A: Online Social Outlets Summary

Table A.1 summarizes the used sources in our work, including the web address, and the start and end dates for collected posts. For TwitterHealth, we use a sample of 10%.

Table A.1 The start and end dates for sources represent the time of first post and last post. Not Applicable (N/A) is used for sources that do not log each post's creation date.

| <b>Dataset</b>                    | <b>URL</b>                               | <b>Start</b>  | <b>End</b>    |
|-----------------------------------|------------------------------------------|---------------|---------------|
| TwitterHealth [1]                 | www.twitter.com                          | May 1, 2013   | Nov. 15, 2013 |
| Google+Health [2]                 | plus.google.com                          | Aug. 24, 2009 | Jan. 05, 2014 |
| Drugs.com [3]                     | www.drugs.com                            | Feb. 16, 2007 | Jan. 26, 2014 |
| DailyStrength /<br>Treatments [4] | www.dailystrength.org/treatments         | N/A           | N/A           |
| WebMD / Drugs [5]                 | www.webmd.com/drugs                      | Sep. 17, 2007 | Nov. 27, 2013 |
| Drugs.com / Answers [6]           | www.drugs.com/answers                    | Mar. 25, 2004 | Feb. 02, 2014 |
| WebMD [7]                         | www.webmd.com                            | Dec. 31, 1999 | Feb. 07, 2014 |
| DailyStrength/Forums<br>[8]       | www.dailystrength.org/support-<br>groups | Jun. 21, 2006 | Jan. 25, 2014 |

## B: Health Keywords

The list of used keywords to filter health-related posts from Twitter and Google+:

Table B.1 Used keywords to filter health-related posts from Twitter and Google+

| <b>Drugs</b> |                |                     |              |                  |
|--------------|----------------|---------------------|--------------|------------------|
| Abilify      | Clonidine      | Glyburide           | Naproxen     | Suboxone         |
| Actonel      | Combivent      | Hydrochlorothiazide | Nasonex      | Sulfamethoxazole |
| Actos        | Concerta       | Hydrocodone         | Nexium       | Synthroid        |
| Advair       | Crestor        | Ibuprofen           | Niaspan      | Toprol           |
| Albuterol    | Cyclobenzaprin | Isosorbide          | Nuvaring     | Tramadol         |
| Alendronate  | Cymbalta       | Januvia             | Omeprazole   | Trazodone        |
| Allopurinol  | Detrol         | Klor-Con            | Oxycodone    | Triamterene      |
| Alprazolam   | Diazepam       | Lantus              | Oxycontin    | Tricor           |
| Ambien       | Digoxin        | Levaquin            | Pantoprazole | TriNessa         |
| Amlodipine   | Diltiazem      | Levothyroxine       | Paroxetine   | Ventolin         |
| Amoxicillin  | Diovan         | Levoxyl             | Penicillin   | Verapamil        |
| Amphetamine  | Doxycycline    | Lexapro             | Plavix       | Viagra           |
| Aricept      | Effexor        | Lipitor             | Potassium    | Vitamin          |
| Atenolol     | Enalapril      | Lisinopril          | Pravastatin  | Vytorin          |
| Azithromycin | Famotidine     | Loestrin            | Premarin     | Vyvanse          |
| Benazepril   | Fexofenadine   | Lorazepam           | Proair       | Warfarin         |
| Benicar      | Flomax         | Lovastatin          | Promethazine | Warfarin         |
| Carisoprodol | Flovent        | Lovaza              | Propoxyphen  | Xalatan          |
| Carvedilol   | Fluconazole    | Lyrice              | Proventil    | Zetia            |

|               |             |                   |             |               |
|---------------|-------------|-------------------|-------------|---------------|
| Cefdinir      | Fluoxetine  | Meloxicam         | Ranitidine  | Zolpidem      |
| Celebrex      | Fluticasone | Metformin         | Seroquel    | Zyprexa       |
| Cephalexin    | Folic       | Methylprednisolon | Sertraline  | Amitriptyline |
| Cialis        | Furosemide  | e                 | Simvastatin | Cheratussin   |
| Ciprofloxacin | Gabapentin  | Metoprolol        | Singulair   | Ocella        |
| Citalopram    | Gabapentin  | Mupirocin         | Spiriva     | Prednisone    |
| Clonazepam    |             | Namenda           |             |               |

### Hashtags

|                |          |         |            |              |
|----------------|----------|---------|------------|--------------|
| #BCSM          | #HCSM    | #hcsmeu | #HITsm     | #mhsm        |
| #doctors20     | #hcsorca | #hcsmin | #Ideagoras | #RareDisease |
| #eldercarechat |          |         |            |              |

### Disorders

|                   |                 |                   |                    |                              |
|-------------------|-----------------|-------------------|--------------------|------------------------------|
| AIDS              | Constipation    | Heart disease     | Liver disease      | Otitis                       |
| Alzheimer         | COPD            | Hemochromatosis   | Lupus              | Overweight                   |
| Anxiety disorders | Crohn's disease | Hepatitis         | Lyme disease       | Parkinson's                  |
| Arthritis         | Cystic fibrosis | Herpes            | Lymphoma           | Pelvic inflammatory disease  |
| Asthma            | Dementia        | High cholesterol  | Meningitis         |                              |
| Astigmatism       | Depression      | HIV               | Meningococcal      | Pertussis                    |
| Autoimmune        | Diabetes        | Hodgkin's disease | Menopause          | Prostate disorder            |
| Bipolar           | Eczema          | HPV               | Mental illness     | Raynaud's                    |
| Cancer            | Endometriosis   | Hypertension      | Migraine           | Phenomenon                   |
| Candidiasis       | Fibroids        | Impotence         | Multiple sclerosis | SARS                         |
| Cataracts         | Fibromyalgia    | Insomnia          | Muscular dystrophy | Sexually transmitted disease |
| Celiac            | Flu             | Irritable bowel   |                    |                              |

|                          |                 |                     |                        |                |
|--------------------------|-----------------|---------------------|------------------------|----------------|
| Chicken pox              | Food poisoning  | syndrome            | Myopia                 | Sleep disorder |
| Chlamydia                | Gallstones      | Jaundice            | Narcolepsy             | Stroke         |
| Chronic fatigue syndrome | Gonorrhea       | Kidney disease      | Non-Hodgkin's lymphoma | Thrush         |
| Cold sore                | Grave's disease | Lactose intolerance | Obesity                | Thyroid        |
| Common cold              | Hay fever       | Leukemia            | Osteoporosis           | Whooping cough |
|                          | Headache        |                     |                        |                |

---

### Pharmaceuticals

|                   |                 |             |       |               |
|-------------------|-----------------|-------------|-------|---------------|
| Johnson & Johnson | GlaxoSmithKline | AstraZeneca | Merck | Eli Lilly     |
| Pfizer            | Novartis        | Abbott      | Bayer | Bristol-Myers |
| Roche             | Sanofi          |             |       |               |

---

### Insurance

|                             |                            |                          |                         |                                |
|-----------------------------|----------------------------|--------------------------|-------------------------|--------------------------------|
| healthcare                  | Company                    | Coventry Health          | Humana                  | Principal Financial Group      |
| health insurance            | Amerigroup                 | EmblemHealth             | Independence Blue Cross | The Regence Group              |
| medicare                    | Anthem Blue Cross          | Fortis                   | Kaiser Permanente       | Tricare                        |
| medicaid                    | Assurant                   | Golden Rule Insurance    | Kaleida Health          | Shelter Insurance              |
| AARP                        | Bankers Life and Casualty  | Group Health Cooperative | LifeWise Health         | Thrivent Financial             |
| Aetna                       | Blue Cross and Blue Shield | HealthNet                | Plan of Oregon          | UnitedHealth                   |
| American Family Insurance   | Centene                    | HealthMarkets            | Medical Mutual of Ohio  | Unitrin                        |
| American Fidelity Assurance | Cigna                      | HealthSpring             | Molina Healthcare       | Universal American Corporation |
| American National           | Conseco                    | Highmark Insurance       | Mutual of Omaha         |                                |
|                             |                            |                          | Premera Blue            |                                |

---

|           |       |                              |
|-----------|-------|------------------------------|
| Insurance | Cross | WellCare Health<br>WellPoint |
|-----------|-------|------------------------------|

## C: Classifiers Evaluation

### C.1 Gender classifiers evaluation

We evaluated our method for classifying gender using Google+Health and Health OSNs users where users reported their gender; Health OSNs where users reported their gender include DailyStrength/Treatments, DailyStrength/Forums, and WebMD / Drugs. Google+Health and the three Health OSNs respectively have 44,614 users and 25,603 users that reported their gender. The resulting confusion matrixes are shown in tables C.1 and C.2 for Google+Health and the three Health OSNs, which achieved accuracies of 98.74% and 76.29% respectively. As we expected, our classification using first name is more accurate than using screen name; nevertheless, our screen name accuracy is reasonable, and much higher for females (greater than 99%). Thus, classification errors using screen name is further reduced due to the fact that the number of females in drug reviews and health forums is much larger than the number of males.

Table C.1 Confusion matrix between the reported genders on Google+Health and our gender classifier using first name.

|        | <b>Classified<br/>female</b> | <b>Classified<br/>male</b> |
|--------|------------------------------|----------------------------|
| Female | 15328                        | 226                        |
| Male   | 334                          | 28726                      |

Table C.2 Confusion matrix between the reported genders on three Health OSNs and our gender classifier using screen name.

|        | <b>Classified<br/>female</b> | <b>Classified<br/>male</b> |
|--------|------------------------------|----------------------------|
| Female | 18504                        | 1028                       |
| Male   | 177                          | 5894                       |

## C.2 Ethnicity classifiers evaluation

In order to evaluate the ethnicity classifier for Google+Health and TwitterHealth, we chose from Google+Health (we expect these results to carry to TwitterHealth) 50 users from each of the 'White', 'Black', 'Asian' and 'Hispanic' races that were identifiable by our classifier. Three authors (S.S., M.S., and M.W.) labeled these users using their profile picture. We only consider the subset of users for which at least two of the labelers agreed on, that is, we label based on majority vote. This left us with 128 labeled users to evaluate the classifier's accuracy. The classifier's accuracy is 81.25%, and the agreement measure for labelers is illustrated in table C.4. The following confusion matrix summarizes the results of applying the classifier to 128 users' last names.

Table C.3 Confusion matrix between the labeled ethnicity on Google+Health and our ethnicity classifier using surname.

| <b>Classifier</b> | <b>Labeled based on profile picture</b> |                 |              |              |
|-------------------|-----------------------------------------|-----------------|--------------|--------------|
|                   | <b>Asian</b>                            | <b>Hispanic</b> | <b>Black</b> | <b>White</b> |
| Asian             | 22                                      | 0               | 0            | 1            |
| Hispanic          | 2                                       | 30              | 0            | 10           |
| Black             | 3                                       | 1               | 21           | 5            |
| White             | 0                                       | 0               | 2            | 31           |

Table C.4 Agreement measure (Cohen's kappa) between three labelers for Google+Health, Health Web Forums and Drug Review Websites

| <b>Labelers</b> | <b>Google+Health (based on image and last name)</b> |
|-----------------|-----------------------------------------------------|
| M.S, M.W        | 0.7                                                 |
| M.S, S.S        | 0.78                                                |
| M.W, S.S        | 0.78                                                |

---

## D: Data Coverage

### D.1 Percentages of reported attributes for each source

Table D.1 shows the percentages of each reported attributes for each source. As indicated in the table's caption, the percentage might be reported by the users or calculated by our classifiers. For gender, we only consider users whose reported first names or screen names are matched to the list of popular names we extracted from U.S. Social Security Administration (as described in the method section). Similarly, for ethnicity classifier we match reported last names with U.S. Census last name list to find the ethnicity with the highest distribution; however, here we don't consider reported screen names, because they led to lower accuracy, and hence we don't include them in the results. We see that only two sources have last names and hence we report no ethnicity information for the rest. For writing level classifier, as mentioned in the methods, we only consider users who have total length of combined posts more than 100 words. Since each Twitter post has maximum length of 140 characters, and we remove links and hashtags, the percentage of users who have concatenated posts length longer than 100 words is small. The N/A entries in the tables are either not reported by the source, or the features needed by the classifiers are not available.

Table D.1 The percentage of reported attribute for each source. Percentages with (\*) indicate that the attributes were calculated by our classifiers. Percentages with (\*\*) indicate reported locations in the United States

| Source                  | Gender   | Age    | Ethnicity | Location  | Writing Level |
|-------------------------|----------|--------|-----------|-----------|---------------|
| TwitterHealth           | 10.49% * | N/A    | 10.54% *  | 16.99% ** | 2.49% *       |
| Google+Health           | 66.29%   | 1.13%  | 16.4% *   | 17.55% ** | 15.89% *      |
| DailyStrength/Treatment | 82.46%   | 73.25% | N/A       | 58.47% ** | 53.68% *      |
| Drugs.com               | 4.26% *  | N/A    | N/A       | N/A       | 15.99% *      |
| WebMD / Drugs           | 96.47%   | 96.08% | N/A       | N/A       | 13.54% *      |
| DailyStrength/Forums    | 74.93%   | 65.23% | N/A       | 51.66% ** | 81.7% *       |
| Drugs.com / Answers     | 6.51% *  | N/A    | N/A       | N/A       | 11.14% *      |
| Webmd                   | 6.25% *  | N/A    | N/A       | N/A       | 50.96% *      |

## D.2 Users distribution among states

Table D.2 shows the percentages of users in each state that participate to the social outlets considered in this paper, that is, we divide the number of users in each state to the population of that state. These distributions were compared with the number of physician, uninsured population, and ratio of people with college degree.

Table D.2 Distribution of users among states

| State | Health Web Forums | Drug Review Websites | TwitterHealth + Google+Health | No. of Physicians per 100,000 [9] | Uninsured population [10] | Ratio of people with college degree [11] |
|-------|-------------------|----------------------|-------------------------------|-----------------------------------|---------------------------|------------------------------------------|
| AL    | 3.21%             | 4.01%                | 0.30%                         | 321                               | 14.44%                    | 22                                       |
| AK    | 4.63%             | 5.06%                | 0.21%                         | 481                               | 18.44%                    | 26.6                                     |
| AZ    | 3.37%             | 4.17%                | 0.24%                         | 368                               | 18.16%                    | 25.6                                     |
| AR    | 2.83%             | 3.56%                | 0.18%                         | 301                               | 18.10%                    | 18.9                                     |



|    |       |       |       |      |        |      |
|----|-------|-------|-------|------|--------|------|
| CA | 2.84% | 3.25% | 0.28% | 351  | 18.99% | 29.9 |
| CO | 4.14% | 4.72% | 0.26% | 354  | 14.06% | 35.9 |
| CT | 3.39% | 4.04% | 0.23% | 471  | 9.30%  | 35.6 |
| DE | 3.76% | 4.46% | 0.21% | 528  | 10.69% | 28.7 |
| DC | 4.54% | 4.63% | 2.33% | 1576 | 9.69%  | 48.5 |
| FL | 3.26% | 3.94% | 0.28% | 336  | 20.65% | 25.3 |
| GA | 3.13% | 3.86% | 0.28% | 320  | 19.29% | 27.5 |
| HI | 2.21% | 2.42% | 0.17% | 623  | 7.78%  | 29.6 |
| ID | 3.89% | 4.61% | 0.13% | 321  | 17.26% | 23.9 |
| IL | 3.09% | 3.77% | 0.26% | 334  | 14.40% | 30.6 |
| IN | 3.76% | 4.71% | 0.23% | 406  | 12.92% | 22.5 |
| IA | 3.55% | 4.24% | 0.22% | 364  | 10.80% | 25.1 |
| KS | 3.51% | 4.37% | 0.32% | 379  | 12.94% | 29.5 |
| KY | 3.55% | 4.31% | 0.24% | 380  | 14.96% | 21   |
| LA | 2.60% | 3.25% | 0.21% | 359  | 19.67% | 21.4 |
| ME | 4.82% | 6.03% | 0.18% | 466  | 9.61%  | 26.9 |
| MD | 3.28% | 3.94% | 0.23% | 486  | 13.01% | 35.7 |
| MA | 4.00% | 4.69% | 0.38% | 508  | 4.35%  | 38.2 |
| MI | 3.79% | 4.52% | 0.25% | 453  | 12.10% | 24.6 |
| MN | 3.56% | 4.31% | 0.25% | 375  | 9.06%  | 31.5 |
| MS | 2.36% | 2.99% | 0.14% | 320  | 17.50% | 19.6 |
| MO | 3.68% | 4.54% | 0.33% | 420  | 14.04% | 25.2 |
| MT | 3.73% | 4.77% | 0.15% | 415  | 18.20% | 27.4 |
| NE | 3.56% | 4.26% | 0.32% | 464  | 12.97% | 27.4 |
| NV | 3.16% | 3.68% | 0.44% | 276  | 22.50% | 21.8 |
| NH | 4.65% | 5.88% | 0.18% | 472  | 11.59% | 32   |
| NJ | 3.28% | 4.01% | 0.20% | 397  | 15.02% | 34.5 |
| NM | 2.91% | 3.35% | 0.16% | 408  | 20.96% | 25.3 |
| NY | 3.22% | 3.78% | 0.36% | 432  | 12.85% | 32.4 |
| NC | 3.36% | 3.99% | 0.24% | 341  | 16.87% | 26.5 |
| ND | 3.54% | 4.10% | 0.22% | 497  | 11.28% | 25.8 |
| OH | 3.63% | 4.45% | 0.27% | 361  | 13.19% | 24.1 |
| OK | 3.33% | 4.17% | 0.23% | 325  | 17.14% | 22.7 |
| OR | 4.27% | 5.23% | 0.25% | 359  | 15.07% | 29.2 |
| PA | 3.89% | 4.69% | 0.29% | 425  | 11.24% | 26.4 |
| RI | 3.47% | 4.74% | 0.40% | 410  | 11.93% | 30.5 |
| SC | 2.81% | 3.54% | 0.23% | 314  | 17.89% | 24.3 |
| SD | 3.17% | 3.47% | 0.19% | 435  | 13.55% | 25.1 |
| TN | 3.48% | 4.25% | 0.25% | 331  | 13.91% | 23   |
| TX | 2.59% | 3.06% | 0.32% | 264  | 24.33% | 25.5 |

|    |       |       |       |     |        |      |
|----|-------|-------|-------|-----|--------|------|
| UT | 3.33% | 4.10% | 0.18% | 317 | 14.26% | 28.5 |
| VT | 4.15% | 5.50% | 0.29% | 547 | 8.24%  | 33.1 |
| VA | 3.36% | 4.07% | 0.23% | 390 | 13.28% | 34   |
| WA | 4.28% | 5.00% | 0.21% | 375 | 13.97% | 31   |
| WV | 3.47% | 4.60% | 0.21% | 380 | 14.30% | 17.3 |
| WI | 3.58% | 4.36% | 0.25% | 410 | 9.83%  | 25.7 |
| WY | 4.32% | 4.86% | 0.23% | 514 | 16.84% | 23.8 |

## References

1. Twitter. <https://twitter.com/>.
2. Google+. <https://plus.google.com/>.
3. Drugs.com | Prescription Drug Information, Interactions & Side Effects. <http://www.drugs.com/>. Archived at: <http://www.webcitation.org/6W23IHwlt>
4. Treatments: reviews of drugs, therapies and remedies by everyday people – DailyStrength. <http://www.dailystrength.org/treatments>. Archived at: <http://www.webcitation.org/6W23nXoJa>
5. WebMD Drugs & Treatments - Medical Information and user ratings on prescription drugs and over-the-counter (OTC) medications. <http://www.webmd.com/drugs/index-drugs.aspx>. Archived at: <http://www.webcitation.org/6W23rKUfB>
6. Medical Questions Answered - Drugs.com. <http://www.drugs.com/answers/>. Archived at: <http://www.webcitation.org/6W23vDAi5>
7. WebMD - Better information. Better health. <http://www.webmd.com/>. Archived at: <http://www.webcitation.org/6W247u0HQ>
8. Online Support Groups - DailyStrength. <http://www.dailystrength.org/support-groups>. Archived at: <http://www.webcitation.org/6W23ztpRe>
9. Young A, Chaudhry HJ, Thomas J V, Dugan M. A Census of actively licensed physicians in the United States , 2012. J Med Regul 2012;99:11-24. <https://www.fsmb.org/Media/Default/PDF/Census/census.pdf>
10. Denavas-walt BC, Proctor BD, Smith JC. Income, poverty, and health insurance coverage in the United States: 2012, U.S. Census Bureau, Current Population Reports. Washington, DC; 2013:60-245. <http://www.census.gov/prod/2013pubs/p60-245.pdf>. Archived at: <http://www.webcitation.org/6W2D1eglk>

11. US Census Bureau. Statistical abstract of the United States: 2012; 2012:143-192.  
<http://www.census.gov/prod/2011pubs/12statab/educ.pdf>. Archived at:  
<http://www.webcitation.org/6W2DHYzQJ>
